# Supplementary material for: Source and Evolution of Subduction–Related Hot Springs Discharged in Tengchong Geothermal Field, Southwest China: Constrained by Stable H, O, and Mg Isotopes
Source: MDPI journal article supplement (doi:10.3390/min12121490), 2022-11-23
Supplement: s1 [file s1]

# 1 Supporting information

2 **Table S1.** Chemical compositions of the Tengchong fluid samples

| Site | Sample            | pH   | Temperature<br>°C | TA<br>mM | F<br>mM | Cl<br>mM | SiO <sub>2</sub><br>mM | SO <sub>4</sub><br>mM | NO <sub>3</sub><br>mM | Na<br>mM | Mg<br>mM | K<br>mM | Ca<br>mM | Li<br>μM | Rb<br>nM | Cs<br>nM |
|------|-------------------|------|-------------------|----------|---------|----------|------------------------|-----------------------|-----------------------|----------|----------|---------|----------|----------|----------|----------|
| DPZ  | 015-DPZ-1         | 8.63 | 94.0              | n.d.     | n.d.    | 0.553    | n.d.                   | b.d.                  | b.d.                  | 14.1     | 0.142    | 0.441   | 0.104    | 11.9     | 24       | 11       |
| DT   | 015-DT-1          | 7.90 | 75.0              | 3.70     | n.d.    | 0.023    | n.d.                   | 0.157                 | b.d.                  | 2.13     | 0.917    | 0.155   | 0.428    | 3.14     | 4        | 2        |
| DT   | 015-DT-3          | 8.01 | 50.0              | 3.79     | n.d.    | 0.025    | n.d.                   | 0.159                 | b.d.                  | 1.85     | 0.784    | 0.131   | 0.445    | 2.46     | 4        | 2        |
| DT   | 015-DT-4          | 7.50 | 75.0              | n.d.     | n.d.    | 0.023    | n.d.                   | 0.155                 | b.d.                  | 1.90     | 0.802    | 0.132   | 0.408    | 2.55     | 4        | 2        |
| HGQ  | 015-HGQ-1         | 2.88 | 58.0              | n.d.     | n.d.    | 0.003    | n.d.                   | b.d.                  | b.d.                  | 0.572    | 0.511    | 0.399   | 4.20     | 0.344    | 19       | 1        |
| HGQ  | 015-HGQ-2         | 2.20 | 70.0              | n.d.     | n.d.    | 0.003    | n.d.                   | b.d.                  | b.d.                  | 0.431    | 0.532    | 0.283   | 2.28     | 0.465    | 19       | 1        |
| HGQ  | 015-HGQ-3         | 2.67 | 61.0              | n.d.     | n.d.    | 0.031    | n.d.                   | b.d.                  | b.d.                  | 0.261    | 0.211    | 0.154   | 0.978    | 0.106    | 9        | 0        |
| HNT  | 015-HNT-1         | 8.14 | 56.0              | n.d.     | n.d.    | 0.979    | n.d.                   | b.d.                  | b.d.                  | 8.21     | 0.370    | 0.735   | 0.155    | 20.2     | 31       | 9        |
| HNT  | 015-HNT-3         | 8.06 | 59.0              | 7.29     | n.d.    | 0.970    | n.d.                   | b.d.                  | b.d.                  | 7.87     | 0.328    | 0.662   | 0.138    | 18.0     | 29       | 9        |
| HNT  | 015-HNT-5         | 8.11 | 66.0              | n.d.     | n.d.    | 0.970    | n.d.                   | b.d.                  | b.d.                  | 8.14     | 0.354    | 0.708   | 0.160    | 19.9     | 31       | 9        |
| HTJ  | 015-HTJ-1         | 8.82 | 99.0              | n.d.     | n.d.    | 8.130    | n.d.                   | 0.080                 | b.d.                  | 32.6     | b.d.     | 2.66    | 0.028    | 143      | 206      | 41       |
| HTJ  | 015-HTJ-2         | 8.59 | 81.0              | n.d.     | n.d.    | 4.539    | n.d.                   | 0.190                 | b.d.                  | 16.8     | 0.004    | 1.44    | 0.052    | 76.9     | 110      | 21       |
| LX   | 015-LX-1          | 8.00 | 80.0              | 15.3     | n.d.    | 2.423    | n.d.                   | 0.103                 | b.d.                  | 20.4     | 0.170    | 1.20    | 0.113    | 45.5     | 55       | 31       |
| SHD  | 015-SHD-1         | 8.36 | 69.0              | 3.78     | n.d.    | 0.090    | n.d.                   | 0.021                 | b.d.                  | 4.32     | 0.003    | 0.118   | 0.370    | 4.13     | 8        | 2        |
| SQ   | 015-SQ-1          | 7.75 | 68.5              | 22.5     | n.d.    | 0.810    | n.d.                   | b.d.                  | b.d.                  | 22.0     | 1.12     | 1.90    | 0.209    | 32.7     | 50       | 20       |
| SQ   | 015-SQ-3          | 8.46 | 68.0              | n.d.     | n.d.    | 0.739    | n.d.                   | b.d.                  | b.d.                  | 21.3     | 1.13     | 2.01    | 0.205    | 33.3     | 50       | 18       |
| ZZQ  | 015-ZZQ-1         | 3.23 | 95.0              | n.d.     | n.d.    | 0.491    | n.d.                   | 0.281                 | b.d.                  | 1.71     | 0.017    | 0.451   | 0.069    | 4.93     | 35       | 2        |
| BLZ  | 2020-BLZB3-L<br>1 | 8.56 | 84.3              | 7.40     | 1.035   | 0.539    | 0.549                  | 0.589                 | 0.001                 | 9.57     | 0.007    | 0.689   | 0.079    | 46.0     | 50       | 39       |
| BLZ  | 2020-BLZ-L1       | 9.26 | 91.9              | 7.65     | 1.000   | 0.530    | 0.551                  | 0.558                 | 0.001                 | 9.34     | 0.005    | 0.596   | 0.039    | 48.8     | 53       | 42       |
| DFQ  | 2020-DFQ-L2       | 8.97 | 96.4              | 6.83     | 0.939   | 0.468    | 0.552                  | 0.701                 | 0.001                 | 8.98     | 0.006    | 0.534   | 0.061    | 43.8     | 44       | 38       |

|       |             |      |      |       |       |       |       |       |        |       |       |       |       |       |    |    |
|-------|-------------|------|------|-------|-------|-------|-------|-------|--------|-------|-------|-------|-------|-------|----|----|
| DT    | 2020-DT-L1  | 8.02 | 66.0 | 4.76  | b.d.  | 0.024 | 0.368 | 0.162 | b.d.   | 1.93  | 0.892 | 0.156 | 1.37  | 2.81  | 4  | 2  |
| HGQ   | 2020-HGQ-L1 | 3.65 | 91.6 | n.d.  | 0.028 | 0.028 | 0.520 | 1.670 | b.d.   | 0.411 | 0.156 | 0.224 | 1.08  | 0.094 | 6  | 0  |
| HGQ   | 2020-HGQ-L2 | 3.47 | 91.6 | n.d.  | 0.069 | 0.044 | 0.533 | 1.612 | 0.001  | 0.412 | 0.155 | 0.241 | 1.08  | 0.089 | 6  | 0  |
| HGQ   | 2020-HGQ-L4 | 4.80 | 57.7 | n.d.  | 0.009 | 0.011 | 0.431 | 0.886 | b.d.   | 0.211 | 0.085 | 0.092 | 0.324 | 0.028 | 2  | 0  |
| QK    | 2020-QK-L1  | 8.47 | 48.6 | 4.58  | 0.609 | 0.129 | 0.481 | b.d.  | 0.0157 | 4.70  | 0.044 | 0.094 | 0.383 | 2.65  | 3  | 1  |
| LW    | 2020-LW-L2  | 8.39 | 80.6 | 2.92  | 0.544 | 0.582 | 0.521 | b.d.  | 0.0011 | 4.30  | 0.017 | 0.203 | 0.311 | 6.50  | 12 | 5  |
| LX    | 2020-LX-L1  | 8.43 | 75.5 | 15.13 | b.d.  | 2.43  | 0.618 | 0.480 | 0.001  | 18.9  | 0.165 | 1.073 | 0.531 | 43.5  | 51 | 28 |
| river | 2020-RLJ-L1 | 7.29 | n.d. | n.d.  | b.d.  | 0.045 | 0.284 | 0.165 | b.d.   | 0.233 | 0.148 | 0.059 | 0.372 | 0.072 | 1  | 0  |
| river | 2020-RLJ-L1 | 7.29 | n.d. | n.d.  | b.d.  | b.d.  | 0.258 | 0.428 | b.d.   | 0.231 | 0.145 | 0.057 | 0.366 | 0.074 | 1  | 0  |
| RST   | 2020-RST-L2 | 8.48 | 71.5 | 14.8  | 0.348 | 7.962 | 0.543 | 0.069 | b.d.   | 21.1  | 0.308 | 1.22  | 0.778 | 32.0  | 70 | 9  |
| SHD   | 2020-SHD-L1 | 8.41 | 64.0 | 3.51  | b.d.  | 0.211 | 0.519 | 0.069 | b.d.   | 3.59  | 0.003 | 0.134 | 0.324 | 3.17  | 7  | 2  |
| SHD   | 2020-SHD-L3 | 8.51 | 66.3 | 3.73  | 0.621 | 0.175 | 0.535 | 0.016 | b.d.   | 3.82  | 0.002 | 0.128 | 0.344 | 3.49  | 7  | 2  |
| SQ    | 2020-SQ-L1  | 8.16 | 65.4 | 22.86 | 0.141 | 1.559 | 0.516 | 0.012 | 0.003  | 19.5  | 1.21  | 1.64  | 1.97  | 28.8  | 48 | 19 |
| SQ    | 2020-SQ-L3  | 8.20 | 66.6 | n.d.  | 0.163 | 1.658 | 0.506 | b.d.  | 0.002  | 19.9  | 1.15  | 1.62  | 1.62  | 28.5  | 48 | 19 |
| SQ    | 2020-SQ-L4  | 8.14 | 63.3 | n.d.  | b.d.  | b.d.  | 0.512 | b.d.  | b.d.   | 20.2  | 1.20  | 1.68  | 1.84  | 29.4  | 49 | 20 |
| TH    | 2020-TH-L2  | 8.59 | 87.1 | 8.17  | 0.574 | 1.382 | 0.597 | 0.330 | 0.003  | 9.97  | 0.020 | 0.506 | 0.172 | 2.02  | 40 | 13 |
| XLS   | 2020-XLS-L1 | 8.76 | 74.8 | 2.16  | 1.020 | b.d.  | 0.473 | 0.109 | 0.001  | 3.19  | 0.001 | 0.068 | 0.061 | 1.99  | 4  | 2  |
| XLS   | 2020-XLS-L1 | 9.04 | 74.8 | n.d.  | b.d.  | b.d.  | b.d.  | b.d.  | b.d.   | 3.39  | 0.001 | 0.066 | 0.059 | 1.97  | 4  | 2  |
| XLS   | 2020-XLS-L3 | 8.41 | 60.3 | 2.73  | 0.980 | 0.089 | 0.473 | 0.087 | 0.001  | 3.64  | 0.007 | 0.071 | 0.107 | 2.69  | 4  | 1  |

n.d.: –

b.d.: below detection line

Sample names beginning with "015" are samples collected in 2019, and those beginning with "2020" indicate samples obtained in 2020. The reason for multiple samples from the same sample site is that there are multiple vents within a sample site, and we sampled all of them, with some differences in fluid content between vents, but less variation between vents within the same site.
